# Supplementary material for: Model-based quantification of metabolic interactions from dynamic microbial-community data
Source: PubMed Central journal article supplement (PMC5344373; doi:10.1371/journal.pone.0173183), 2017-03-09
Supplement: pone.0173183.s002.pdf [file pone.0173183.s002.pdf]

| <b>Reaction name</b>                   | <b>Reaction</b>                                                                                                           |
|----------------------------------------|---------------------------------------------------------------------------------------------------------------------------|
| H <sub>2</sub> transport               | H <sub>2</sub> → H <sub>2</sub> (e)                                                                                       |
| NO <sub>2</sub> <sup>-</sup> transport | NO <sub>2</sub> <sup>-</sup> → NO <sub>2</sub> <sup>-</sup> (e)                                                           |
| NO <sub>3</sub> <sup>-</sup> transport | NO <sub>3</sub> <sup>-</sup> → NO <sub>3</sub> <sup>-</sup> (e)                                                           |
| Acetate transport                      | Acetate + H <sup>+</sup> → Acetate(e) + H <sup>+</sup> (e)                                                                |
| NO <sub>3</sub> <sup>-</sup> reductase | 2NO <sub>3</sub> <sup>-</sup> + 2QH <sub>2</sub> → 2NO <sub>2</sub> <sup>-</sup> + ATP + 2Q + 2H <sub>2</sub> O           |
| NO <sub>2</sub> <sup>-</sup> reductase | NO <sub>2</sub> <sup>-</sup> + 3QH <sub>2</sub> + 2H <sup>+</sup> → NH <sub>4</sub> <sup>+</sup> + 3Q + 2H <sub>2</sub> O |
| H <sub>2</sub> reductase               | H <sub>2</sub> + Q → QH <sub>2</sub>                                                                                      |
| Biomass Reaction                       | 30ATP + 2.2NH <sub>4</sub> <sup>+</sup> + 4.84Acetate → Biomass                                                           |
